# Supplementary material for: Analysis of merged transcriptomic and genomic datasets to identify genes and pathways underlying residual feed intake in growing pigs
Source: PubMed Central journal article supplement (PMC9763391; doi:10.1038/s41598-022-26496-1), 2022-12-19
Supplement: 41598_2022_26496_MOESM1_ESM.pdf [file 41598_2022_26496_MOESM1_ESM.pdf]

## **Supplemental Information**

### **Analysis of merged transcriptomic and genomic datasets to identify genes and pathways underlying residual feed intake in growing pigs**

Emil Ibragimov, Anni Øyan Pedersen, Liang Xiao, Susanna Cirera, Merete Fredholm, Peter Karlskov-Mortensen

## Supplemental Figure 1

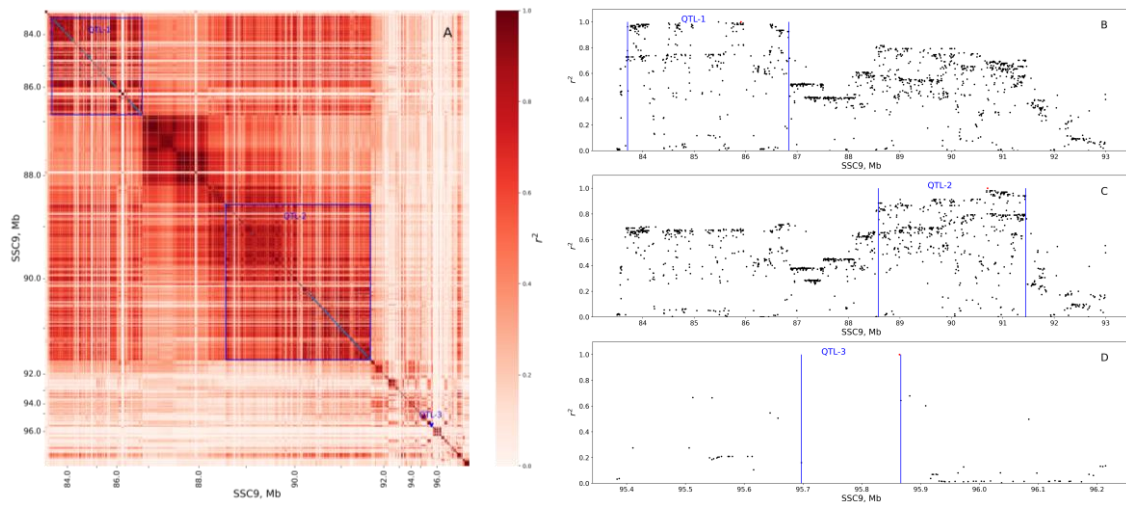

## Supplemental Figure 2

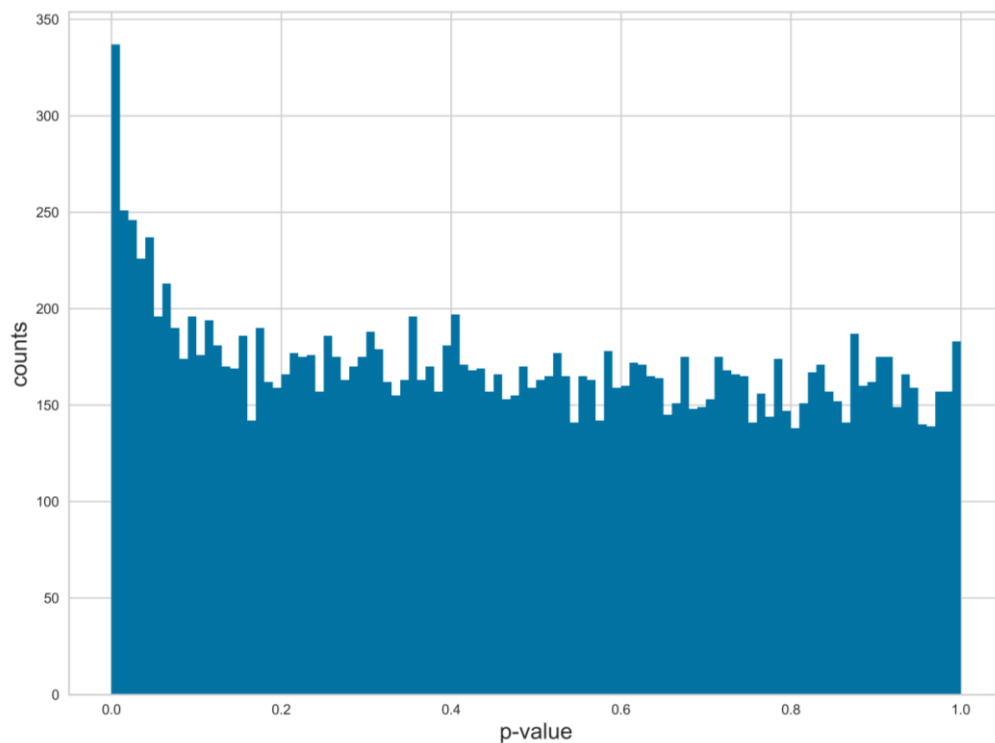

### Supplemental Figure 3

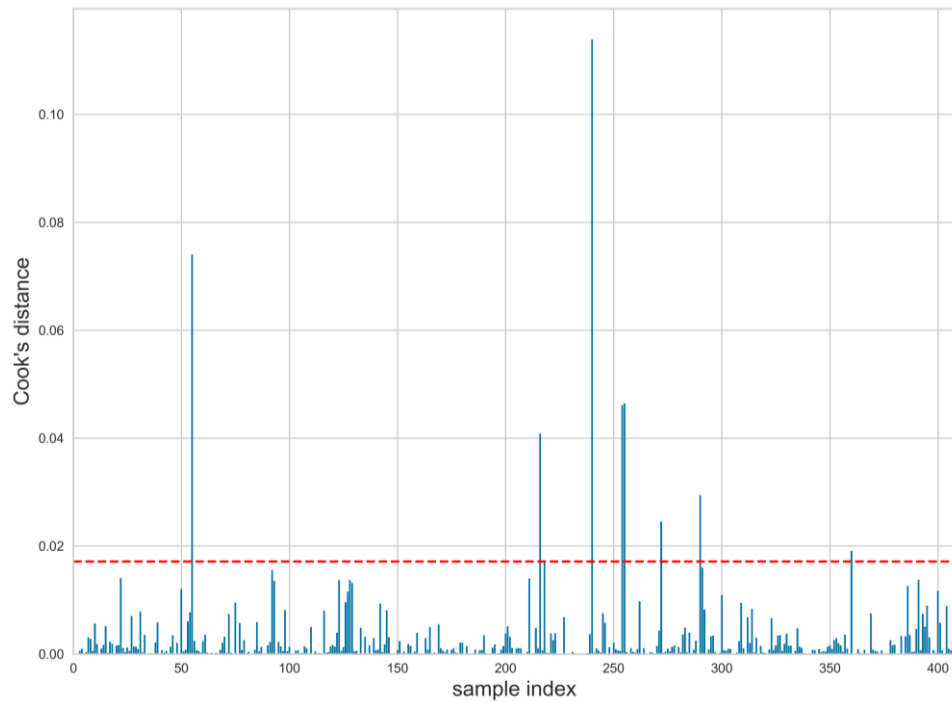

Suppl. Fig. 3 – The phenotype outlier detection. Cook's distances were calculated using the multiple regression model for expected ADFI. The dashed red line indicates the threshold value (the 98<sup>th</sup> percentile).

### Supplemental Figure 4

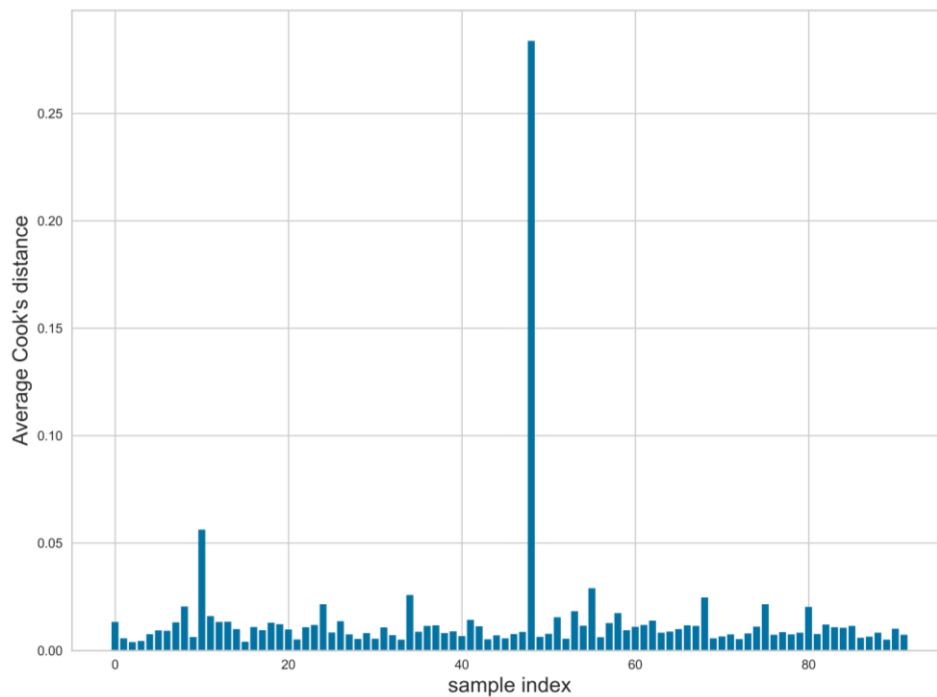

Suppl. Fig. 4 – Gene expression outlier detection. For each sample an average Cook's distance based on all genes included in DE-analysis was calculated. The sample with the highest value was excluded from further analyses.

**Suppl. Table 1: Genes located in QTLs.**

| Gene name          | Chromosome | Left bp  | Right bp | Ensembl biotype      | QTL   |
|--------------------|------------|----------|----------|----------------------|-------|
| DGKB               | 9          | 83569920 | 84510087 | protein_coding       | QTL-1 |
| AGMO               | 9          | 84470277 | 84894843 | protein_coding       | QTL-1 |
| U2                 | 9          | 84738014 | 84738145 | snRNA                | QTL-1 |
| ENSSSCG00000042517 | 9          | 84754816 | 84759401 | pseudogene           | QTL-1 |
| ENSSSCG00000043100 | 9          | 84864192 | 84867029 | protein_coding       | QTL-1 |
| MEOX2              | 9          | 84943197 | 85010157 | protein_coding       | QTL-1 |
| ENSSSCG00000046863 | 9          | 85011895 | 85013422 | lncRNA               | QTL-1 |
| ENSSSCG00000041560 | 9          | 85012018 | 85020122 | lncRNA               | QTL-1 |
| ENSSSCG00000048170 | 9          | 85023913 | 85029881 | protein_coding       | QTL-1 |
| CRPPA              | 9          | 85415550 | 85710752 | protein_coding       | QTL-1 |
| ENSSSCG00000051224 | 9          | 85495576 | 85497634 | pseudogene           | QTL-1 |
| ENSSSCG00000032864 | 9          | 85566098 | 85567136 | protein_coding       | QTL-1 |
| SOSTDC1            | 9          | 85743335 | 85747591 | protein_coding       | QTL-1 |
| LRRC72             | 9          | 85803124 | 85844803 | protein_coding       | QTL-1 |
| ANKMY2             | 9          | 85848002 | 85887427 | protein_coding       | QTL-1 |
| BZW2               | 9          | 85886158 | 85947408 | protein_coding       | QTL-1 |
| TSPAN13            | 9          | 85996640 | 86033354 | protein_coding       | QTL-1 |
| AGR2               | 9          | 86039015 | 86053857 | protein_coding       | QTL-1 |
| ENSSSCG00000046663 | 9          | 86262425 | 86268978 | lncRNA               | QTL-1 |
| ENSSSCG00000048277 | 9          | 86337636 | 86340325 | protein_coding       | QTL-1 |
| ENSSSCG00000044725 | 9          | 86487601 | 86511181 | lncRNA               | QTL-1 |
| AHR                | 9          | 86511369 | 86555943 | protein_coding       | QTL-1 |
| ENSSSCG00000044052 | 9          | 86634902 | 86642522 | protein_coding       | QTL-1 |
| ENSSSCG00000046719 | 9          | 86782583 | 86801932 | lncRNA               | QTL-1 |
| ENSSSCG00000044171 | 9          | 88623752 | 88631633 | lncRNA               | QTL-2 |
| ENSSSCG00000042617 | 9          | 88739064 | 88742446 | lncRNA               | QTL-2 |
| POLR1F             | 9          | 88760398 | 88785802 | protein_coding       | QTL-2 |
| ENSSSCG00000046636 | 9          | 88774011 | 88778275 | pseudogene           | QTL-2 |
| ENSSSCG00000048521 | 9          | 88794910 | 88796687 | lncRNA               | QTL-2 |
| TMEM196            | 9          | 88798827 | 88858013 | protein_coding       | QTL-2 |
| MACC1              | 9          | 89102621 | 89210309 | protein_coding       | QTL-2 |
| ITGB8              | 9          | 89341141 | 89450679 | protein_coding       | QTL-2 |
| ENSSSCG00000049419 | 9          | 89409912 | 89412059 | processed_pseudogene | QTL-2 |
| ABCB5              | 9          | 89595284 | 89738368 | protein_coding       | QTL-2 |
| SP8                | 9          | 89764764 | 89767425 | protein_coding       | QTL-2 |
| ENSSSCG00000045940 | 9          | 89887473 | 89889927 | processed_pseudogene | QTL-2 |
| SP4                | 9          | 90336690 | 90410295 | protein_coding       | QTL-2 |
| DNAH11             | 9          | 90423077 | 90767487 | protein_coding       | QTL-2 |
| ENSSSCG00000042690 | 9          | 90440588 | 90445294 | protein_coding       | QTL-2 |
| ENSSSCG00000043741 | 9          | 90654785 | 90658603 | protein_coding       | QTL-2 |
| CDCA7L             | 9          | 90766767 | 90806865 | protein_coding       | QTL-2 |
| ENSSSCG00000035257 | 9          | 90950852 | 90951232 | protein_coding       | QTL-2 |
| RAPGEF5            | 9          | 90958078 | 91578992 | protein_coding       | QTL-2 |

**Suppl. Table 2:** Differentially Expressed genes.

| gene_name          | baseMean | log2FoldChange | lfcSE | stat   | pvalue   | FDR    |
|--------------------|----------|----------------|-------|--------|----------|--------|
| MARCO              | 15.71    | 2.073          | 0.424 | 4.894  | 9.87E-07 | 0.0084 |
| TRAV16             | 6.91     | 1.871          | 0.376 | 4.978  | 6.44E-07 | 0.0084 |
| ENSSSCG00000046518 | 2180.72  | 2.566          | 0.558 | 4.596  | 4.31E-06 | 0.0203 |
| CXCL11             | 114.64   | 1.555          | 0.34  | 4.576  | 4.75E-06 | 0.0203 |
| CD5                | 636.74   | 0.626          | 0.143 | 4.366  | 1.26E-05 | 0.0432 |
| ENSSSCG00000025271 | 193.66   | 0.942          | 0.219 | 4.296  | 1.74E-05 | 0.0495 |
| PPP3CA             | 689.48   | 0.367          | 0.087 | 4.232  | 2.32E-05 | 0.0544 |
| CALHM6             | 121.18   | 0.81           | 0.194 | 4.184  | 2.87E-05 | 0.0544 |
| SNX10              | 282.99   | 0.798          | 0.19  | 4.204  | 2.63E-05 | 0.0544 |
| ENSSSCG00000034614 | 218.04   | -0.322         | 0.078 | -4.113 | 3.91E-05 | 0.0651 |
| GNG10              | 642.95   | 0.435          | 0.106 | 4.097  | 4.19E-05 | 0.0651 |
| IFNAR1             | 1222.54  | 0.276          | 0.069 | 4.027  | 5.64E-05 | 0.0803 |
| SRGN               | 1645.41  | 0.663          | 0.165 | 4.007  | 6.15E-05 | 0.0809 |
| ENSSSCG00000022947 | 829.05   | -0.254         | 0.064 | -3.947 | 7.93E-05 | 0.0903 |
| IRF2               | 927.43   | 0.265          | 0.067 | 3.963  | 7.41E-05 | 0.0903 |
| LXN                | 361      | 0.334          | 0.085 | 3.922  | 8.77E-05 | 0.0937 |
| ENSSSCG00000033382 | 31.19    | 2.975          | 0.764 | 3.893  | 9.91E-05 | 0.0996 |

**Suppl. Table 3:** Rank-based enrichment test for DE analysis results (based on p-values).

| category   | term ID    | term description                                    | genes mapped | enrichment score | FDR      |
|------------|------------|-----------------------------------------------------|--------------|------------------|----------|
| GO Process | GO:0050863 | Regulation of t cell activation                     | 160          | 0.853926         | 1.86E-07 |
| GO Process | GO:1903037 | Regulation of leukocyte cell-cell adhesion          | 149          | 0.881867         | 1.86E-07 |
| GO Process | GO:0002696 | Positive regulation of leukocyte activation         | 154          | 0.726468         | 1.5E-06  |
| GO Process | GO:0050867 | Positive regulation of cell activation              | 161          | 0.70816          | 1.52E-06 |
| GO Process | GO:1903039 | Positive regulation of leukocyte cell-cell adhesion | 110          | 0.896731         | 1.98E-06 |
| GO Process | GO:0051251 | Positive regulation of lymphocyte activation        | 135          | 0.770889         | 2.59E-06 |
| GO Process | GO:0050870 | Positive regulation of t cell activation            | 97           | 0.910962         | 1.12E-05 |
| GO Process | GO:0045619 | Regulation of lymphocyte differentiation            | 104          | 0.826927         | 1.86E-05 |
| GO Process | GO:0022409 | Positive regulation of cell-cell adhesion           | 131          | 0.703475         | 0.00031  |
| GO Process | GO:0070663 | Regulation of leukocyte proliferation               | 106          | 0.848784         | 0.00035  |
| GO Process | GO:0050670 | Regulation of lymphocyte proliferation              | 105          | 0.829606         | 0.00065  |
| GO Process | GO:0045580 | Regulation of t cell differentiation                | 84           | 0.762499         | 0.0017   |
| GO Process | GO:1902105 | Regulation of leukocyte differentiation             | 144          | 0.603402         | 0.0018   |
| GO Process | GO:0042129 | Regulation of t cell proliferation                  | 78           | 0.93524          | 0.002    |

|                 |            |                                                                                                                                                                   |     |          |         |
|-----------------|------------|-------------------------------------------------------------------------------------------------------------------------------------------------------------------|-----|----------|---------|
| GO Process      | GO:0042102 | Positive regulation of t cell proliferation                                                                                                                       | 46  | 1.09379  | 0.0026  |
| GO Process      | GO:0007159 | Leukocyte cell-cell adhesion                                                                                                                                      | 26  | 1.08023  | 0.0033  |
| GO Process      | GO:0048002 | Antigen processing and presentation of peptide antigen                                                                                                            | 29  | 1.87474  | 0.0048  |
| GO Process      | GO:0060326 | Cell chemotaxis                                                                                                                                                   | 105 | 0.730724 | 0.0048  |
| GO Process      | GO:0002703 | Regulation of leukocyte mediated immunity                                                                                                                         | 104 | 0.585696 | 0.0085  |
| GO Process      | GO:0050900 | Leukocyte migration                                                                                                                                               | 102 | 0.68836  | 0.009   |
| GO Component    | GO:0009897 | External side of plasma membrane                                                                                                                                  | 157 | 0.771634 | 0.00084 |
| STRING clusters | CL:726     | Mixed, incl. allograft rejection, and t cell receptor complex                                                                                                     | 25  | 1.92018  | 0.00011 |
| STRING clusters | CL:1456    | Mixed, incl. chemokine-mediated signaling pathway, and protein complex involved in cell adhesion                                                                  | 69  | 1.13067  | 0.00034 |
| STRING clusters | CL:19423   | Cytosolic ribosome                                                                                                                                                | 56  | 0.277707 | 0.0019  |
| STRING clusters | CL:19430   | Ribosome, and cytosolic small ribosomal subunit                                                                                                                   | 50  | 0.086305 | 0.0044  |
| STRING clusters | CL:2139    | Mixed, incl. antigen processing and presentation of peptide antigen via mhc class i, and immunoregulatory interactions between a lymphoid and a non-lymphoid cell | 60  | 1.26259  | 0.0044  |
| STRING clusters | CL:19428   | Cytosolic ribosome                                                                                                                                                | 53  | 0.275033 | 0.0047  |
| STRING clusters | CL:2140    | Mixed, incl. antigen processing and presentation of peptide antigen via mhc class i, and immunoregulatory interactions between a lymphoid and a non-lymphoid cell | 56  | 1.32529  | 0.0049  |
| STRING clusters | CL:2141    | Mixed, incl. antigen processing and presentation of peptide antigen via mhc class i, and immunoregulatory interactions between a lymphoid and a non-lymphoid cell | 37  | 1.5148   | 0.0049  |
| KEGG            | ssc04612   | Antigen processing and presentation                                                                                                                               | 39  | 1.78151  | 0.00085 |
| KEGG            | ssc05320   | Autoimmune thyroid disease                                                                                                                                        | 23  | 1.91636  | 0.0039  |
| KEGG            | ssc05340   | Primary immunodeficiency                                                                                                                                          | 21  | 1.58394  | 0.0039  |
| KEGG            | ssc04060   | Cytokine-cytokine receptor interaction                                                                                                                            | 134 | 0.57398  | 0.0045  |
| KEGG            | ssc04940   | Type I diabetes mellitus                                                                                                                                          | 26  | 1.52273  | 0.0045  |
| KEGG            | ssc05144   | Malaria                                                                                                                                                           | 32  | 0.85202  | 0.0045  |

|          |           |                                                                 |    |         |        |
|----------|-----------|-----------------------------------------------------------------|----|---------|--------|
| KEGG     | ssc05140  | Leishmaniasis                                                   | 43 | 1.3064  | 0.0057 |
| Pfam     | PF07654   | Immunoglobulin C1-set domain                                    | 33 | 1.82296 | 0.0017 |
| InterPro | IPR003597 | Immunoglobulin C1-set                                           | 26 | 2.09077 | 0.0041 |
| InterPro | IPR003006 | Immunoglobulin/major histocompatibility complex, conserved site | 23 | 2.23977 | 0.0043 |
| SMART    | SM00407   | Immunoglobulin C-Type                                           | 28 | 2.08806 | 0.0004 |

**Suppl. Table 4:** Rank-based enrichment test results for DE analysis results (based on log fold change values). Values were ranked in ascending order, thus top and bottom directions indicate downregulation and upregulation in the high RFI group of pigs.

| category   | term ID    | term description                                    | genes mapped | enrichment score | direction | FDR      |
|------------|------------|-----------------------------------------------------|--------------|------------------|-----------|----------|
| GO Process | GO:0002250 | Adaptive immune response                            | 163          | 0.601892         | bottom    | 7.7E-12  |
| GO Process | GO:0050867 | Positive regulation of cell activation              | 162          | 0.586475         | bottom    | 1.92E-11 |
| GO Process | GO:0002696 | Positive regulation of leukocyte activation         | 155          | 0.583127         | bottom    | 9.8E-11  |
| GO Process | GO:0051251 | Positive regulation of lymphocyte activation        | 135          | 0.640014         | bottom    | 2.96E-10 |
| GO Process | GO:1903037 | Regulation of leukocyte cell-cell adhesion          | 149          | 0.551598         | bottom    | 6.44E-10 |
| GO Process | GO:1903039 | Positive regulation of leukocyte cell-cell adhesion | 110          | 0.626833         | bottom    | 8.96E-10 |
| GO Process | GO:0050870 | Positive regulation of t cell activation            | 97           | 0.684668         | bottom    | 1.64E-09 |
| GO Process | GO:0050863 | Regulation of t cell activation                     | 160          | 0.517244         | bottom    | 2.81E-09 |
| GO Process | GO:0019221 | Cytokine-mediated signaling pathway                 | 178          | 0.490811         | bottom    | 2.86E-09 |
| GO Process | GO:0070663 | Regulation of leukocyte proliferation               | 106          | 0.632395         | bottom    | 4.82E-09 |
| GO Process | GO:0050670 | Regulation of lymphocyte proliferation              | 105          | 0.624004         | bottom    | 1.07E-08 |
| GO Process | GO:0022409 | Positive regulation of cell-cell adhesion           | 131          | 0.549031         | bottom    | 2.11E-08 |
| GO Process | GO:0050900 | Leukocyte migration                                 | 102          | 0.671974         | bottom    | 9.44E-08 |
| GO Process | GO:0001819 | Positive regulation of cytokine production          | 200          | 0.471619         | bottom    | 1.42E-07 |
| GO Process | GO:0042102 | Positive regulation of t cell proliferation         | 46           | 0.81245          | bottom    | 1.51E-07 |
| GO Process | GO:0060326 | Cell chemotaxis                                     | 105          | 0.723738         | bottom    | 1.51E-07 |
| GO Process | GO:0050671 | Positive regulation of lymphocyte proliferation     | 64           | 0.757587         | bottom    | 2.19E-07 |
| GO Process | GO:0070665 | Positive regulation of leukocyte proliferation      | 65           | 0.750836         | bottom    | 3.9E-07  |
| GO Process | GO:0050727 | Regulation of inflammatory response                 | 167          | 0.450219         | bottom    | 4.79E-06 |
| GO Process | GO:0042129 | Regulation of t cell proliferation                  | 78           | 0.574171         | bottom    | 4.86E-06 |

|            |            |                                                                                                      |     |          |           |          |
|------------|------------|------------------------------------------------------------------------------------------------------|-----|----------|-----------|----------|
| GO Process | GO:0030595 | Leukocyte chemotaxis                                                                                 | 62  | 0.905681 | bottom    | 6.15E-06 |
| GO Process | GO:0007159 | Leukocyte cell-cell adhesion                                                                         | 26  | 0.922209 | bottom    | 8.78E-06 |
| GO Process | GO:0045619 | Regulation of lymphocyte differentiation                                                             | 104 | 0.455794 | bottom    | 1.13E-05 |
| GO Process | GO:1902107 | Positive regulation of leukocyte differentiation                                                     | 77  | 0.575899 | bottom    | 2.22E-05 |
| GO Process | GO:0002695 | Negative regulation of leukocyte activation                                                          | 88  | 0.590644 | bottom    | 0.000023 |
| GO Process | GO:0050864 | Regulation of b cell activation                                                                      | 66  | 0.606999 | bottom    | 0.000023 |
| GO Process | GO:1902105 | Regulation of leukocyte differentiation                                                              | 144 | 0.416607 | bottom    | 0.000023 |
| GO Process | GO:1990266 | Neutrophil migration                                                                                 | 35  | 1.09513  | bottom    | 2.33E-05 |
| GO Process | GO:0071219 | Cellular response to molecule of bacterial origin                                                    | 92  | 0.669449 | bottom    | 2.47E-05 |
| GO Process | GO:0002237 | Response to molecule of bacterial origin                                                             | 135 | 0.496749 | bottom    | 2.59E-05 |
| GO Process | GO:0007059 | Chromosome segregation                                                                               | 178 | 0.192857 | top       | 3.01E-05 |
| GO Process | GO:0042110 | T cell activation                                                                                    | 126 | 0.392008 | bottom    | 3.42E-05 |
| GO Process | GO:0071216 | Cellular response to biotic stimulus                                                                 | 107 | 0.623586 | bottom    | 3.42E-05 |
| GO Process | GO:0030593 | Neutrophil chemotaxis                                                                                | 30  | 1.21982  | bottom    | 3.92E-05 |
| GO Process | GO:0002699 | Positive regulation of immune effector process                                                       | 112 | 0.444282 | bottom    | 3.93E-05 |
| GO Process | GO:0071222 | Cellular response to lipopolysaccharide                                                              | 84  | 0.708097 | bottom    | 4.52E-05 |
| GO Process | GO:0045621 | Positive regulation of lymphocyte differentiation                                                    | 57  | 0.637595 | bottom    | 7.05E-05 |
| GO Process | GO:0050866 | Negative regulation of cell activation                                                               | 99  | 0.535127 | bottom    | 9.88E-05 |
| GO Process | GO:0032103 | Positive regulation of response to external stimulus                                                 | 185 | 0.363496 | bottom    | 0.00011  |
| GO Process | GO:0097529 | Myeloid leukocyte migration                                                                          | 49  | 0.921258 | bottom    | 0.00011  |
| GO Process | GO:0140014 | Mitotic nuclear division                                                                             | 99  | 0.214775 | top       | 0.00011  |
| GO Process | GO:0032496 | Response to lipopolysaccharide                                                                       | 126 | 0.498446 | bottom    | 0.00012  |
| GO Process | GO:0032663 | Regulation of interleukin-2 production                                                               | 30  | 0.664791 | bottom    | 0.00012  |
| GO Process | GO:0006814 | Sodium ion transport                                                                                 | 111 | 0.35415  | both ends | 0.00014  |
| GO Process | GO:0031349 | Positive regulation of defense response                                                              | 122 | 0.447734 | bottom    | 0.00014  |
| GO Process | GO:0072676 | Lymphocyte migration                                                                                 | 31  | 0.971213 | bottom    | 0.00014  |
| GO Process | GO:0002822 | Regulation of adaptive immune response based on somatic recombination of immune receptors built from | 78  | 0.488645 | bottom    | 0.00022  |



|            |            |                                                                                                                                                  |     |          |           |         |
|------------|------------|--------------------------------------------------------------------------------------------------------------------------------------------------|-----|----------|-----------|---------|
|            |            | immunoglobulin superfamily domains                                                                                                               |     |          |           |         |
| GO Process | GO:0048285 | Organelle fission                                                                                                                                | 190 | 0.21071  | top       | 0.00023 |
| GO Process | GO:0051250 | Negative regulation of lymphocyte activation                                                                                                     | 71  | 0.572184 | bottom    | 0.00024 |
| GO Process | GO:0000280 | Nuclear division                                                                                                                                 | 169 | 0.236366 | top       | 0.00025 |
| GO Process | GO:0045582 | Positive regulation of t cell differentiation                                                                                                    | 47  | 0.713146 | bottom    | 0.00025 |
| GO Process | GO:0097530 | Granulocyte migration                                                                                                                            | 41  | 0.947666 | bottom    | 0.00026 |
| GO Process | GO:0006813 | Potassium ion transport                                                                                                                          | 86  | 0.32827  | both ends | 0.00031 |
| GO Process | GO:0002697 | Regulation of immune effector process                                                                                                            | 193 | 0.353304 | bottom    | 0.00032 |
| GO Process | GO:0034341 | Response to interferon-gamma                                                                                                                     | 47  | 0.768777 | bottom    | 0.00033 |
| GO Process | GO:0000819 | Sister chromatid segregation                                                                                                                     | 93  | 0.205958 | top       | 0.00035 |
| GO Process | GO:0071805 | Potassium ion transmembrane transport                                                                                                            | 82  | 0.328045 | both ends | 0.00045 |
| GO Process | GO:0002824 | Positive regulation of adaptive immune response based on somatic recombination of immune receptors built from immunoglobulin superfamily domains | 54  | 0.555638 | bottom    | 0.00046 |
| GO Process | GO:0071621 | Granulocyte chemotaxis                                                                                                                           | 35  | 1.06204  | bottom    | 0.00047 |
| GO Process | GO:1903708 | Positive regulation of hemopoiesis                                                                                                               | 101 | 0.439201 | bottom    | 0.00047 |
| GO Process | GO:0002819 | Regulation of adaptive immune response                                                                                                           | 84  | 0.466236 | bottom    | 0.00053 |
| GO Process | GO:0002703 | Regulation of leukocyte mediated immunity                                                                                                        | 104 | 0.346452 | bottom    | 0.00054 |
| GO Process | GO:0070098 | Chemokine-mediated signaling pathway                                                                                                             | 40  | 0.749994 | bottom    | 0.00055 |
| GO Process | GO:0098813 | Nuclear chromosome segregation                                                                                                                   | 132 | 0.217341 | top       | 0.00057 |
| GO Process | GO:0071346 | Cellular response to interferon-gamma                                                                                                            | 37  | 0.944016 | bottom    | 0.00065 |
| GO Process | GO:1901617 | Organic hydroxy compound biosynthetic process                                                                                                    | 86  | 0.426883 | top       | 0.00067 |
| GO Process | GO:0046165 | Alcohol biosynthetic process                                                                                                                     | 64  | 0.53918  | top       | 0.00071 |
| GO Process | GO:0045580 | Regulation of t cell differentiation                                                                                                             | 84  | 0.42627  | bottom    | 0.00076 |
| GO Process | GO:1990869 | Cellular response to chemokine                                                                                                                   | 48  | 0.649667 | bottom    | 0.00077 |
| GO Process | GO:0007187 | G protein-coupled receptor signaling pathway, coupled to cyclic nucleotide second messenger                                                      | 104 | 0.283911 | both ends | 0.00079 |
| GO Process | GO:0048002 | Antigen processing and presentation of peptide antigen                                                                                           | 29  | 0.49026  | both ends | 0.0008  |

|            |            |                                                                                                                           |     |          |           |         |
|------------|------------|---------------------------------------------------------------------------------------------------------------------------|-----|----------|-----------|---------|
| GO Process | GO:0002521 | Leukocyte differentiation                                                                                                 | 180 | 0.344865 | bottom    | 0.00097 |
| GO Process | GO:0002821 | Positive regulation of adaptive immune response                                                                           | 56  | 0.533683 | bottom    | 0.00097 |
| GO Process | GO:0002706 | Regulation of lymphocyte mediated immunity                                                                                | 71  | 0.422526 | bottom    | 0.0011  |
| GO Process | GO:0035725 | Sodium ion transmembrane transport                                                                                        | 94  | 0.336085 | both ends | 0.0011  |
| GO Process | GO:0046634 | Regulation of alpha-beta t cell activation                                                                                | 49  | 0.655585 | bottom    | 0.0011  |
| GO Process | GO:0048193 | Golgi vesicle transport                                                                                                   | 177 | 0.182223 | top       | 0.0011  |
| GO Process | GO:0007218 | Neuropeptide signaling pathway                                                                                            | 32  | 0.555892 | both ends | 0.0012  |
| GO Process | GO:0019882 | Antigen processing and presentation                                                                                       | 42  | 0.419197 | both ends | 0.0012  |
| GO Process | GO:0042391 | Regulation of membrane potential                                                                                          | 169 | 0.246024 | both ends | 0.0012  |
| GO Process | GO:0031343 | Positive regulation of cell killing                                                                                       | 31  | 0.877384 | bottom    | 0.0013  |
| GO Process | GO:0032649 | Regulation of interferon-gamma production                                                                                 | 47  | 0.553705 | bottom    | 0.0013  |
| GO Process | GO:0032729 | Positive regulation of interferon-gamma production                                                                        | 36  | 0.64111  | bottom    | 0.0013  |
| GO Process | GO:0007188 | Adenylate cyclase-modulating g protein-coupled receptor signaling pathway                                                 | 97  | 0.284947 | both ends | 0.0014  |
| GO Process | GO:0002274 | Myeloid leukocyte activation                                                                                              | 78  | 0.369773 | bottom    | 0.0016  |
| GO Process | GO:0002460 | Adaptive immune response based on somatic recombination of immune receptors built from immunoglobulin superfamily domains | 77  | 0.51679  | bottom    | 0.0019  |
| GO Process | GO:0002705 | Positive regulation of leukocyte mediated immunity                                                                        | 73  | 0.359913 | bottom    | 0.0019  |
| GO Process | GO:0002831 | Regulation of response to biotic stimulus                                                                                 | 142 | 0.33663  | bottom    | 0.0019  |
| GO Process | GO:0000070 | Mitotic sister chromatid segregation                                                                                      | 73  | 0.211103 | top       | 0.002   |
| GO Process | GO:0006695 | Cholesterol biosynthetic process                                                                                          | 22  | 0.937129 | top       | 0.0023  |
| GO Process | GO:0016126 | Sterol biosynthetic process                                                                                               | 26  | 0.911109 | top       | 0.0023  |
| GO Process | GO:1902653 | Secondary alcohol biosynthetic process                                                                                    | 24  | 0.928624 | top       | 0.0023  |
| GO Process | GO:0002253 | Activation of immune response                                                                                             | 123 | 0.387696 | bottom    | 0.0024  |
| GO Process | GO:0002443 | Leukocyte mediated immunity                                                                                               | 98  | 0.342588 | bottom    | 0.0025  |
| GO Process | GO:0070646 | Protein modification by small protein removal                                                                             | 90  | 0.16414  | top       | 0.0026  |

|            |            |                                                                     |     |          |           |        |
|------------|------------|---------------------------------------------------------------------|-----|----------|-----------|--------|
| GO Process | GO:2000106 | Regulation of leukocyte apoptotic process                           | 39  | 0.709092 | bottom    | 0.0028 |
| GO Process | GO:0031341 | Regulation of cell killing                                          | 38  | 0.694578 | bottom    | 0.0034 |
| GO Process | GO:0008015 | Blood circulation                                                   | 138 | 0.201487 | both ends | 0.0035 |
| GO Process | GO:0002708 | Positive regulation of lymphocyte mediated immunity                 | 52  | 0.432677 | bottom    | 0.0036 |
| GO Process | GO:0019932 | Second-messenger-mediated signaling                                 | 176 | 0.209697 | both ends | 0.0036 |
| GO Process | GO:0071103 | DNA conformation change                                             | 159 | 0.205706 | top       | 0.0039 |
| GO Process | GO:0042742 | Defense response to bacterium                                       | 64  | 0.505318 | bottom    | 0.0042 |
| GO Process | GO:0006302 | Double-strand break repair                                          | 120 | 0.234301 | top       | 0.0043 |
| GO Process | GO:0016579 | Protein deubiquitination                                            | 79  | 0.171527 | top       | 0.0043 |
| GO Process | GO:0034765 | Regulation of ion transmembrane transport                           | 198 | 0.226924 | both ends | 0.0043 |
| GO Process | GO:0050871 | Positive regulation of b cell activation                            | 42  | 0.603227 | bottom    | 0.0048 |
| GO Process | GO:0046635 | Positive regulation of alpha-beta t cell activation                 | 31  | 0.740098 | bottom    | 0.005  |
| GO Process | GO:0050729 | Positive regulation of inflammatory response                        | 65  | 0.611829 | bottom    | 0.005  |
| GO Process | GO:0031663 | Lipopolysaccharide-mediated signaling pathway                       | 24  | 0.773421 | bottom    | 0.0051 |
| GO Process | GO:0006066 | Alcohol metabolic process                                           | 173 | 0.302185 | top       | 0.0052 |
| GO Process | GO:0045088 | Regulation of innate immune response                                | 83  | 0.371454 | bottom    | 0.0053 |
| GO Process | GO:0030888 | Regulation of b cell proliferation                                  | 32  | 0.745787 | bottom    | 0.0059 |
| GO Process | GO:0007600 | Sensory perception                                                  | 182 | 0.210647 | both ends | 0.006  |
| GO Process | GO:0018022 | Peptidyl-lysine methylation                                         | 56  | 0.304096 | top       | 0.0075 |
| GO Process | GO:0032652 | Regulation of interleukin-1 production                              | 29  | 0.673098 | bottom    | 0.0075 |
| GO Process | GO:0032653 | Regulation of interleukin-10 production                             | 23  | 0.849537 | bottom    | 0.0077 |
| GO Process | GO:0002263 | Cell activation involved in immune response                         | 100 | 0.344856 | bottom    | 0.0079 |
| GO Process | GO:0002700 | Regulation of production of molecular mediator of immune response   | 72  | 0.452566 | bottom    | 0.0082 |
| GO Process | GO:0002764 | Immune response-regulating signaling pathway                        | 86  | 0.388774 | bottom    | 0.0084 |
| GO Process | GO:0003341 | Cilium movement                                                     | 65  | 0.377303 | both ends | 0.0087 |
| GO Process | GO:1903555 | Regulation of tumor necrosis factor superfamily cytokine production | 67  | 0.556883 | bottom    | 0.0087 |

|             |            |                                                      |     |          |           |          |
|-------------|------------|------------------------------------------------------|-----|----------|-----------|----------|
| GO Process  | GO:0071356 | Cellular response to tumor necrosis factor           | 80  | 0.493817 | bottom    | 0.0093   |
| GO Process  | GO:0035637 | Multicellular organismal signaling                   | 45  | 0.385822 | both ends | 0.0095   |
| GO Process  | GO:0070661 | Leukocyte proliferation                              | 44  | 0.586947 | bottom    | 0.0096   |
| GO Process  | GO:0032732 | Positive regulation of interleukin-1 production      | 21  | 0.783435 | bottom    | 0.0098   |
| GO Process  | GO:0034612 | Response to tumor necrosis factor                    | 92  | 0.440678 | bottom    | 0.0099   |
| GO Function | GO:0140375 | Immune receptor activity                             | 82  | 0.752268 | bottom    | 2.23E-07 |
| GO Function | GO:0004930 | G protein-coupled receptor activity                  | 181 | 0.338368 | both ends | 2.93E-07 |
| GO Function | GO:0003735 | Structural constituent of ribosome                   | 114 | 0.342122 | bottom    | 3.33E-07 |
| GO Function | GO:0019955 | Cytokine binding                                     | 82  | 0.571234 | bottom    | 6.16E-07 |
| GO Function | GO:0022836 | Gated channel activity                               | 148 | 0.363522 | both ends | 8.43E-07 |
| GO Function | GO:0005261 | Cation channel activity                              | 157 | 0.358159 | both ends | 9.5E-07  |
| GO Function | GO:0048018 | Receptor ligand activity                             | 196 | 0.37191  | both ends | 3.36E-06 |
| GO Function | GO:0004896 | Cytokine receptor activity                           | 69  | 0.709071 | bottom    | 6.86E-06 |
| GO Function | GO:0005125 | Cytokine activity                                    | 93  | 0.473248 | bottom    | 5.79E-05 |
| GO Function | GO:0001653 | Peptide receptor activity                            | 63  | 0.439916 | both ends | 9.26E-05 |
| GO Function | GO:0004386 | Helicase activity                                    | 120 | 0.295868 | top       | 9.26E-05 |
| GO Function | GO:0008528 | G protein-coupled peptide receptor activity          | 59  | 0.435678 | bottom    | 0.00044  |
| GO Function | GO:0005126 | Cytokine receptor binding                            | 110 | 0.419592 | bottom    | 0.00063  |
| GO Function | GO:0016874 | Ligase activity                                      | 120 | 0.256905 | top       | 0.00072  |
| GO Function | GO:0042379 | Chemokine receptor binding                           | 24  | 0.999113 | bottom    | 0.0012   |
| GO Function | GO:0005244 | Voltage-gated ion channel activity                   | 85  | 0.362769 | both ends | 0.0014   |
| GO Function | GO:0005518 | Collagen binding                                     | 48  | 0.568149 | bottom    | 0.0014   |
| GO Function | GO:0015276 | Ligand-gated ion channel activity                    | 49  | 0.466934 | both ends | 0.0014   |
| GO Function | GO:0001664 | G protein-coupled receptor binding                   | 131 | 0.293124 | bottom    | 0.0019   |
| GO Function | GO:0005267 | Potassium channel activity                           | 50  | 0.403609 | both ends | 0.0022   |
| GO Function | GO:0015081 | Sodium ion transmembrane transporter activity        | 90  | 0.339436 | both ends | 0.0043   |
| GO Function | GO:0004843 | Thiol-dependent ubiquitin-specific protease activity | 71  | 0.190027 | top       | 0.0045   |
| GO Function | GO:0005230 | Extracellular ligand-gated ion channel activity      | 24  | 0.651527 | both ends | 0.0052   |
| GO Function | GO:0015079 | Potassium ion transmembrane transporter activity     | 74  | 0.286493 | both ends | 0.0052   |
| GO Function | GO:0005044 | Scavenger receptor activity                          | 30  | 1.07714  | bottom    | 0.0053   |

|                 |            |                                                 |     |          |           |          |
|-----------------|------------|-------------------------------------------------|-----|----------|-----------|----------|
| GO Function     | GO:0005249 | Voltage-gated potassium channel activity        | 32  | 0.537637 | both ends | 0.0053   |
| GO Function     | GO:0008094 | DNA-dependent ATPase activity                   | 72  | 0.361827 | top       | 0.0053   |
| GO Function     | GO:0008242 | Omega peptidase activity                        | 75  | 0.207333 | top       | 0.006    |
| GO Function     | GO:0099094 | Ligand-gated cation channel activity            | 39  | 0.483137 | both ends | 0.006    |
| GO Function     | GO:0022843 | Voltage-gated cation channel activity           | 53  | 0.465945 | both ends | 0.0068   |
| GO Function     | GO:0003774 | Motor activity                                  | 87  | 0.295205 | top       | 0.007    |
| GO Function     | GO:0015370 | Solute:sodium symporter activity                | 42  | 0.484164 | both ends | 0.007    |
| GO Function     | GO:0030594 | Neurotransmitter receptor activity              | 30  | 0.582718 | both ends | 0.0074   |
| GO Function     | GO:0003823 | Antigen binding                                 | 25  | 0.874966 | bottom    | 0.0084   |
| GO Component    | GO:0022626 | Cytosolic ribosome                              | 67  | 0.627752 | bottom    | 1.69E-17 |
| GO Component    | GO:0009897 | External side of plasma membrane                | 157 | 0.611329 | bottom    | 4.65E-15 |
| GO Component    | GO:0022627 | Cytosolic small ribosomal subunit               | 33  | 0.641169 | bottom    | 5.72E-09 |
| GO Component    | GO:0022625 | Cytosolic large ribosomal subunit               | 33  | 0.664503 | bottom    | 1.47E-07 |
| GO Component    | GO:0044391 | Ribosomal subunit                               | 123 | 0.312691 | bottom    | 8.75E-07 |
| GO Component    | GO:0005840 | Ribosome                                        | 144 | 0.263493 | bottom    | 4.22E-06 |
| GO Component    | GO:1902495 | Transmembrane transporter complex               | 131 | 0.352318 | both ends | 5.35E-05 |
| GO Component    | GO:0034702 | Ion channel complex                             | 124 | 0.365643 | both ends | 6.63E-05 |
| GO Component    | GO:1990351 | Transporter complex                             | 136 | 0.319375 | both ends | 0.00022  |
| GO Component    | GO:0015935 | Small ribosomal subunit                         | 50  | 0.368989 | bottom    | 0.00032  |
| GO Component    | GO:0034705 | Potassium channel complex                       | 31  | 0.545979 | both ends | 0.00041  |
| GO Component    | GO:0098562 | Cytoplasmic side of membrane                    | 111 | 0.275701 | bottom    | 0.00067  |
| GO Component    | GO:0034703 | Cation channel complex                          | 94  | 0.377026 | both ends | 0.0011   |
| GO Component    | GO:0000793 | Condensed chromosome                            | 132 | 0.224321 | top       | 0.0018   |
| GO Component    | GO:0031225 | Anchored component of membrane                  | 76  | 0.365477 | bottom    | 0.0018   |
| GO Component    | GO:0015934 | Large ribosomal subunit                         | 74  | 0.273283 | bottom    | 0.0048   |
| GO Component    | GO:0098802 | Plasma membrane signaling receptor complex      | 90  | 0.365255 | bottom    | 0.0048   |
| STRING clusters | CL:19418   | Cytosolic ribosome                              | 58  | 0.690085 | bottom    | 2E-20    |
| STRING clusters | CL:19423   | Cytosolic ribosome                              | 56  | 0.721436 | bottom    | 2E-20    |
| STRING clusters | CL:19404   | Cytosolic ribosome                              | 62  | 0.637683 | bottom    | 2.75E-20 |
| STRING clusters | CL:19413   | Cytosolic ribosome                              | 59  | 0.651986 | bottom    | 4.63E-20 |
| STRING clusters | CL:19366   | Cytosolic ribosome, and ribosomal protein l44   | 73  | 0.559774 | bottom    | 1.58E-19 |
| STRING clusters | CL:19428   | Cytosolic ribosome                              | 53  | 0.724749 | bottom    | 1.58E-19 |
| STRING clusters | CL:19430   | Ribosome, and cytosolic small ribosomal subunit | 50  | 0.736591 | bottom    | 2.41E-19 |

|                 |          |                                                                                                                                  |    |          |        |          |
|-----------------|----------|----------------------------------------------------------------------------------------------------------------------------------|----|----------|--------|----------|
| STRING clusters | CL:19370 | Cytosolic ribosome                                                                                                               | 72 | 0.560669 | bottom | 3.58E-19 |
| STRING clusters | CL:19399 | Cytosolic ribosome                                                                                                               | 67 | 0.594907 | bottom | 7.15E-19 |
| STRING clusters | CL:19374 | Cytosolic ribosome                                                                                                               | 71 | 0.543734 | bottom | 8.62E-19 |
| STRING clusters | CL:19394 | Cytosolic ribosome                                                                                                               | 68 | 0.572925 | bottom | 2.07E-18 |
| STRING clusters | CL:19389 | Cytosolic ribosome                                                                                                               | 70 | 0.538341 | bottom | 2.16E-18 |
| STRING clusters | CL:1456  | Mixed, incl. chemokine-mediated signaling pathway, and protein complex involved in cell adhesion                                 | 69 | 1.00944  | bottom | 2.91E-17 |
| STRING clusters | CL:19364 | Cytosolic ribosome, and ribosomal protein l44                                                                                    | 79 | 0.494095 | bottom | 6.23E-17 |
| STRING clusters | CL:19357 | Cytosolic ribosome, and translation elongation factor activity                                                                   | 85 | 0.483637 | bottom | 3.93E-16 |
| STRING clusters | CL:19360 | Cytosolic ribosome, and translation elongation factor activity                                                                   | 81 | 0.486015 | bottom | 4.15E-16 |
| STRING clusters | CL:19432 | Ribosome                                                                                                                         | 40 | 0.682082 | bottom | 6.64E-16 |
| STRING clusters | CL:19440 | Ribosome                                                                                                                         | 36 | 0.664535 | bottom | 3.68E-15 |
| STRING clusters | CL:19436 | Ribosome                                                                                                                         | 38 | 0.65855  | bottom | 6.12E-15 |
| STRING clusters | CL:19445 | Ribosome                                                                                                                         | 34 | 0.658462 | bottom | 8.81E-14 |
| STRING clusters | CL:19447 | Ribosome                                                                                                                         | 26 | 0.644053 | bottom | 7.71E-10 |
| STRING clusters | CL:19449 | Ribosome                                                                                                                         | 21 | 0.655976 | bottom | 1.32E-08 |
| STRING clusters | CL:1458  | Chemokine-mediated signaling pathway                                                                                             | 37 | 1.04275  | bottom | 2.25E-07 |
| STRING clusters | CL:1591  | Mixed, incl. leukocyte cell-cell adhesion, and lysosome-associated membrane glycoprotein (lamp)                                  | 31 | 0.953772 | bottom | 2.25E-07 |
| STRING clusters | CL:1461  | Chemokine receptors bind chemokines, and Chemokine interleukin-8-like domain                                                     | 33 | 1.10202  | bottom | 2.29E-07 |
| STRING clusters | CL:726   | Mixed, incl. allograft rejection, and t cell receptor complex                                                                    | 25 | 1.21544  | bottom | 1.04E-06 |
| STRING clusters | CL:12705 | Mixed, incl. nucleotide receptor activity, and immunoglobulin                                                                    | 64 | 0.83394  | bottom | 4.29E-06 |
| STRING clusters | CL:1464  | Chemokine receptors bind chemokines, and CCR3 chemokine receptor binding                                                         | 30 | 1.07566  | bottom | 6.15E-06 |
| STRING clusters | CL:2139  | Mixed, incl. antigen processing and presentation of peptide antigen via mhc class i, and immunoregulatory interactions between a | 60 | 0.573509 | bottom | 2.35E-05 |

|                 |          |                                                                                                                                                                   |     |          |        |          |
|-----------------|----------|-------------------------------------------------------------------------------------------------------------------------------------------------------------------|-----|----------|--------|----------|
|                 |          | lymphoid and a non-lymphoid cell                                                                                                                                  |     |          |        |          |
| STRING clusters | CL:2141  | Mixed, incl. antigen processing and presentation of peptide antigen via mhc class i, and immunoregulatory interactions between a lymphoid and a non-lymphoid cell | 37  | 0.634907 | bottom | 3.98E-05 |
| STRING clusters | CL:508   | Mixed, incl. sh2 domain, and asthma                                                                                                                               | 98  | 0.509173 | bottom | 5.27E-05 |
| STRING clusters | CL:2140  | Mixed, incl. antigen processing and presentation of peptide antigen via mhc class i, and immunoregulatory interactions between a lymphoid and a non-lymphoid cell | 56  | 0.548757 | bottom | 6.55E-05 |
| STRING clusters | CL:12706 | Mixed, incl. immunoglobulin like, and immunoregulatory interactions between a lymphoid and a non-lymphoid cell                                                    | 34  | 1.17586  | bottom | 7.52E-05 |
| STRING clusters | CL:506   | Mixed, incl. sh2 domain, and transmembrane receptor protein tyrosine kinase activity                                                                              | 115 | 0.413542 | bottom | 0.00014  |
| STRING clusters | CL:1466  | Chemokine receptors bind chemokines, and CCR3 chemokine receptor binding                                                                                          | 26  | 0.961409 | bottom | 0.00039  |
| STRING clusters | CL:17383 | Mixed, incl. condensed chromosome, centromeric region, and anaphase-promoting complex                                                                             | 99  | 0.24958  | top    | 0.00043  |
| STRING clusters | CL:17385 | Mixed, incl. condensed chromosome, centromeric region, and microtubule binding                                                                                    | 86  | 0.249361 | top    | 0.00077  |
| STRING clusters | CL:17387 | Mixed, incl. mitotic sister chromatid segregation, and condensed chromosome outer kinetochore                                                                     | 62  | 0.272673 | top    | 0.001    |
| STRING clusters | CL:1592  | Mixed, incl. leukocyte cell-cell adhesion, and intercellular adhesion molecule, n-terminal                                                                        | 23  | 0.844003 | bottom | 0.0011   |
| STRING clusters | CL:1142  | JAK-STAT signaling pathway, and cytokine receptor activity                                                                                                        | 77  | 0.471455 | bottom | 0.0012   |
| STRING clusters | CL:1150  | JAK-STAT signaling pathway, and receptor                                                                                                                          | 53  | 0.499022 | bottom | 0.0015   |

|                 |          |                                                                                                                                                       |     |          |           |          |
|-----------------|----------|-------------------------------------------------------------------------------------------------------------------------------------------------------|-----|----------|-----------|----------|
|                 |          | signaling pathway via STAT                                                                                                                            |     |          |           |          |
| STRING clusters | CL:17386 | Mixed, incl. condensed chromosome, centromeric region, and condensin complex                                                                          | 74  | 0.251778 | top       | 0.0015   |
| STRING clusters | CL:28545 | Sterol biosynthetic process, and bile acid biosynthetic process                                                                                       | 22  | 1.05461  | top       | 0.0017   |
| STRING clusters | CL:1686  | Mixed, incl. toll-like receptor cascades, and tumor necrosis factor receptor binding                                                                  | 81  | 0.362062 | bottom    | 0.0021   |
| STRING clusters | CL:2142  | Mixed, incl. antigen processing and presentation of peptide antigen via mhc class i, and natural killer cell receptor-like, c-type lectin-like domain | 27  | 0.48349  | bottom    | 0.0021   |
| STRING clusters | CL:16746 | DNA replication, and Fanconi anemia pathway                                                                                                           | 116 | 0.257149 | top       | 0.0025   |
| STRING clusters | CL:1685  | Mixed, incl. toll-like receptor cascades, and tumor necrosis factor receptor binding                                                                  | 89  | 0.318902 | bottom    | 0.0043   |
| STRING clusters | CL:17389 | Mixed, incl. mitotic sister chromatid segregation, and negative regulation of mitotic sister chromatid separation                                     | 53  | 0.272053 | top       | 0.0049   |
| STRING clusters | CL:1143  | JAK-STAT signaling pathway, and receptor signaling pathway via STAT                                                                                   | 63  | 0.482792 | bottom    | 0.0051   |
| STRING clusters | CL:637   | Mixed, incl. fceri mediated ca+2 mobilization, and b cell receptor signaling pathway                                                                  | 30  | 0.64202  | bottom    | 0.0055   |
| STRING clusters | CL:20638 | tRNA aminoacylation, and regulation of mitochondrial RNA catabolic process                                                                            | 61  | 0.202837 | top       | 0.0066   |
| STRING clusters | CL:1687  | Mixed, incl. toll-like receptor cascades, and death domain                                                                                            | 75  | 0.330889 | bottom    | 0.0077   |
| STRING clusters | CL:20076 | rRNA processing, and tRNA methylation                                                                                                                 | 130 | 0.162113 | top       | 0.0077   |
| STRING clusters | CL:1684  | Mixed, incl. nf-kappa b signaling pathway, and positive regulation of cysteine-type endopeptidase activity                                            | 107 | 0.259675 | bottom    | 0.0097   |
| KEGG            | ssc04060 | Cytokine-cytokine receptor interaction                                                                                                                | 134 | 0.544192 | bottom    | 8.69E-13 |
| KEGG            | ssc04080 | Neuroactive ligand-receptor interaction                                                                                                               | 115 | 0.549806 | both ends | 1.19E-12 |



|          |            |                                                               |     |          |        |          |
|----------|------------|---------------------------------------------------------------|-----|----------|--------|----------|
| KEGG     | ssc04640   | Hematopoietic cell lineage                                    | 54  | 0.861014 | bottom | 5.83E-11 |
| KEGG     | ssc04514   | Cell adhesion molecules                                       | 79  | 0.705132 | bottom | 1.67E-08 |
| KEGG     | ssc04061   | Viral protein interaction with cytokine and cytokine receptor | 48  | 0.928901 | bottom | 1.71E-08 |
| KEGG     | ssc04612   | Antigen processing and presentation                           | 39  | 1.07919  | bottom | 3.73E-08 |
| KEGG     | ssc05320   | Autoimmune thyroid disease                                    | 23  | 1.41162  | bottom | 1.71E-07 |
| KEGG     | ssc03010   | Ribosome                                                      | 73  | 0.362753 | bottom | 2.3E-07  |
| KEGG     | ssc04940   | Type I diabetes mellitus                                      | 26  | 1.05494  | bottom | 9.69E-07 |
| KEGG     | ssc05330   | Allograft rejection                                           | 23  | 1.10792  | bottom | 2.04E-06 |
| KEGG     | ssc05323   | Rheumatoid arthritis                                          | 55  | 0.786768 | bottom | 2.39E-06 |
| KEGG     | ssc05340   | Primary immunodeficiency                                      | 21  | 1.0191   | bottom | 3.81E-06 |
| KEGG     | ssc05140   | Leishmaniasis                                                 | 43  | 0.791122 | bottom | 4.06E-06 |
| KEGG     | ssc05332   | Graft-versus-host disease                                     | 22  | 1.08381  | bottom | 4.39E-06 |
| KEGG     | ssc05321   | Inflammatory bowel disease                                    | 42  | 0.86574  | bottom | 4.75E-06 |
| KEGG     | ssc04672   | Intestinal immune network for IgA production                  | 31  | 1.00093  | bottom | 7.04E-06 |
| KEGG     | ssc05144   | Malaria                                                       | 32  | 0.651095 | bottom | 1.02E-05 |
| KEGG     | ssc04380   | Osteoclast differentiation                                    | 70  | 0.521587 | bottom | 8.25E-05 |
| KEGG     | ssc05150   | Staphylococcus aureus infection                               | 40  | 0.618353 | bottom | 0.00025  |
| KEGG     | ssc04062   | Chemokine signaling pathway                                   | 108 | 0.437426 | bottom | 0.00026  |
| KEGG     | ssc04659   | Th17 cell differentiation                                     | 72  | 0.555607 | bottom | 0.00064  |
| KEGG     | ssc04064   | NF-kappa B signaling pathway                                  | 69  | 0.446485 | bottom | 0.00093  |
| KEGG     | ssc04650   | Natural killer cell mediated cytotoxicity                     | 55  | 0.362997 | bottom | 0.0013   |
| KEGG     | ssc05416   | Viral myocarditis                                             | 36  | 0.706473 | bottom | 0.0013   |
| KEGG     | ssc04610   | Complement and coagulation cascades                           | 46  | 0.556741 | bottom | 0.0036   |
| KEGG     | ssc05152   | Tuberculosis                                                  | 96  | 0.422057 | bottom | 0.0049   |
| KEGG     | ssc04142   | Lysosome                                                      | 83  | 0.374474 | bottom | 0.0052   |
| KEGG     | ssc05322   | Systemic lupus erythematosus                                  | 33  | 0.695306 | bottom | 0.0054   |
| KEGG     | ssc04742   | Taste transduction                                            | 28  | 0.556304 | top    | 0.0056   |
| KEGG     | ssc04658   | Th1 and Th2 cell differentiation                              | 59  | 0.523849 | bottom | 0.0057   |
| KEGG     | ssc05168   | Herpes simplex virus 1 infection                              | 171 | 0.221474 | bottom | 0.006    |
| KEGG     | ssc00020   | Citrate cycle (TCA cycle)                                     | 25  | 0.401737 | top    | 0.0063   |
| KEGG     | ssc01200   | Carbon metabolism                                             | 76  | 0.203544 | top    | 0.0077   |
| KEGG     | ssc05145   | Toxoplasmosis                                                 | 70  | 0.451956 | bottom | 0.0083   |
| Reactome | SSC-373076 | Class A/1 (Rhodopsin-like receptors)                          | 83  | 0.681523 | bottom | 2.26E-07 |

|              |              |                                                                                                        |     |          |           |          |
|--------------|--------------|--------------------------------------------------------------------------------------------------------|-----|----------|-----------|----------|
| Reactome     | SSC-72689    | Formation of a pool of free 40S subunits                                                               | 33  | 0.606559 | bottom    | 2.26E-07 |
| Reactome     | SSC-72706    | GTP hydrolysis and joining of the 60S ribosomal subunit                                                | 26  | 0.711684 | bottom    | 9.94E-07 |
| Reactome     | SSC-500792   | GPCR ligand binding                                                                                    | 91  | 0.625133 | bottom    | 1.64E-06 |
| Reactome     | SSC-156827   | L13a-mediated translational silencing of Ceruloplasmin expression                                      | 40  | 0.526397 | bottom    | 1.75E-06 |
| Reactome     | SSC-72737    | Cap-dependent Translation Initiation                                                                   | 42  | 0.509061 | bottom    | 1.94E-06 |
| Reactome     | SSC-1799339  | SRP-dependent cotranslational protein targeting to membrane                                            | 29  | 0.60982  | bottom    | 1.84E-05 |
| Reactome     | SSC-380108   | Chemokine receptors bind chemokines                                                                    | 28  | 1.05443  | bottom    | 1.84E-05 |
| Reactome     | SSC-68886    | M Phase                                                                                                | 169 | 0.188098 | top       | 1.84E-05 |
| Reactome     | SSC-975956   | Nonsense Mediated Decay (NMD) independent of the Exon Junction Complex (EJC)                           | 31  | 0.55214  | bottom    | 1.84E-05 |
| Reactome     | SSC-388396   | GPCR downstream signalling                                                                             | 191 | 0.292799 | both ends | 7.47E-05 |
| Reactome     | SSC-375276   | Peptide ligand-binding receptors                                                                       | 45  | 0.804189 | bottom    | 8.65E-05 |
| Reactome     | SSC-975957   | Nonsense Mediated Decay (NMD) enhanced by the Exon Junction Complex (EJC)                              | 38  | 0.456397 | bottom    | 0.00012  |
| Reactome     | SSC-68877    | Mitotic Prometaphase                                                                                   | 100 | 0.218568 | top       | 0.00058  |
| Reactome     | SSC-72649    | Translation initiation complex formation                                                               | 29  | 0.406718 | bottom    | 0.00067  |
| Reactome     | SSC-72702    | Ribosomal scanning and start codon recognition                                                         | 28  | 0.399524 | bottom    | 0.0014   |
| Reactome     | SSC-2555396  | Mitotic Metaphase and Anaphase                                                                         | 108 | 0.188481 | top       | 0.0016   |
| Reactome     | SSC-72662    | Activation of the mRNA upon binding of the cap-binding complex and eIFs, and subsequent binding to 43S | 30  | 0.39362  | bottom    | 0.0016   |
| Reactome     | SSC-68882    | Mitotic Anaphase                                                                                       | 107 | 0.186734 | top       | 0.0019   |
| Reactome     | SSC-2467813  | Separation of Sister Chromatids                                                                        | 84  | 0.183559 | top       | 0.0078   |
| COMPARTMENTS | GOCC:0022626 | Cytosolic ribosome                                                                                     | 66  | 0.693969 | bottom    | 3.48E-21 |
| COMPARTMENTS | GOCC:0022625 | Cytosolic large ribosomal subunit                                                                      | 34  | 0.682204 | bottom    | 5.67E-10 |
| COMPARTMENTS | GOCC:0022627 | Cytosolic small ribosomal subunit                                                                      | 31  | 0.762413 | bottom    | 5.67E-10 |
| COMPARTMENTS | GOCC:0044391 | Ribosomal subunit                                                                                      | 114 | 0.400617 | bottom    | 2.54E-09 |
| COMPARTMENTS | GOCC:0005840 | Ribosome                                                                                               | 120 | 0.356341 | bottom    | 3.26E-08 |
| COMPARTMENTS | GOCC:0009986 | Cell surface                                                                                           | 196 | 0.36959  | bottom    | 3.26E-08 |
| COMPARTMENTS | GOCC:0015935 | Small ribosomal subunit                                                                                | 47  | 0.46814  | bottom    | 5.87E-05 |

|                  |              |                                             |     |          |           |          |
|------------------|--------------|---------------------------------------------|-----|----------|-----------|----------|
| COMPARTMENTS     | GOCC:1902495 | Transmembrane transporter complex           | 125 | 0.367628 | both ends | 0.00035  |
| COMPARTMENTS     | GOCC:0015934 | Large ribosomal subunit                     | 69  | 0.348649 | bottom    | 0.00046  |
| COMPARTMENTS     | GOCC:0034702 | Ion channel complex                         | 108 | 0.33378  | top       | 0.00086  |
| COMPARTMENTS     | GOCC:0042788 | Polysomal ribosome                          | 22  | 0.38904  | bottom    | 0.00089  |
| COMPARTMENTS     | GOCC:0034703 | Cation channel complex                      | 91  | 0.382755 | top       | 0.0027   |
| COMPARTMENTS     | GOCC:0034705 | Potassium channel complex                   | 31  | 0.388139 | both ends | 0.0027   |
| COMPARTMENTS     | GOCC:0031012 | Extracellular matrix                        | 159 | 0.096372 | bottom    | 0.0036   |
| COMPARTMENTS     | GOCC:0000793 | Condensed chromosome                        | 78  | 0.297318 | top       | 0.0043   |
| COMPARTMENTS     | GOCC:0030141 | Secretory granule                           | 162 | 0.219564 | both ends | 0.0062   |
| COMPARTMENTS     | GOCC:0098552 | Side of membrane                            | 122 | 0.248387 | bottom    | 0.0078   |
| UniProt Keywords | KW-0407      | Ion channel                                 | 82  | 0.583416 | both ends | 2.02E-09 |
| UniProt Keywords | KW-0687      | Ribonucleoprotein                           | 108 | 0.287224 | bottom    | 2.02E-09 |
| UniProt Keywords | KW-0689      | Ribosomal protein                           | 77  | 0.3717   | bottom    | 2.02E-09 |
| UniProt Keywords | KW-0406      | Ion transport                               | 152 | 0.374323 | both ends | 7.58E-08 |
| UniProt Keywords | KW-0297      | G-protein coupled receptor                  | 101 | 0.419511 | both ends | 7.65E-06 |
| UniProt Keywords | KW-0807      | Transducer                                  | 126 | 0.373869 | both ends | 1.28E-05 |
| UniProt Keywords | KW-0851      | Voltage-gated channel                       | 28  | 0.591539 | both ends | 1.77E-05 |
| UniProt Keywords | KW-0202      | Cytokine                                    | 38  | 0.76108  | bottom    | 3.37E-05 |
| UniProt Keywords | KW-0505      | Motor protein                               | 62  | 0.396312 | top       | 0.000034 |
| UniProt Keywords | KW-0391      | Immunity                                    | 57  | 0.614779 | bottom    | 0.0012   |
| UniProt Keywords | KW-0436      | Ligase                                      | 50  | 0.299495 | top       | 0.0012   |
| UniProt Keywords | KW-0633      | Potassium transport                         | 29  | 0.488758 | both ends | 0.0012   |
| UniProt Keywords | KW-0393      | Immunoglobulin domain                       | 78  | 0.371926 | bottom    | 0.0018   |
| UniProt Keywords | KW-0853      | WD repeat                                   | 174 | 0.205994 | top       | 0.0034   |
| UniProt Keywords | KW-0130      | Cell adhesion                               | 59  | 0.449967 | bottom    | 0.0043   |
| UniProt Keywords | KW-0630      | Potassium                                   | 36  | 0.377132 | both ends | 0.0052   |
| UniProt Keywords | KW-0165      | Cleavage on pair of basic residues          | 31  | 0.537739 | both ends | 0.0057   |
| Pfam             | PF10320      | Serpentine type 7TM GPCR chemoreceptor Srsx | 50  | 0.701476 | both ends | 1.1E-07  |
| Pfam             | PF00001      | 7 transmembrane receptor (rhodopsin family) | 114 | 0.508672 | bottom    | 1.36E-07 |
| Pfam             | PF07654      | Immunoglobulin C1-set domain                | 33  | 1.1711   | bottom    | 7.91E-07 |
| Pfam             | PF07686      | Immunoglobulin V-set domain                 | 113 | 0.544085 | bottom    | 1.58E-06 |

|          |           |                                                                 |     |          |           |          |
|----------|-----------|-----------------------------------------------------------------|-----|----------|-----------|----------|
| Pfam     | PF13927   | Immunoglobulin domain                                           | 166 | 0.318591 | bottom    | 2.66E-05 |
| Pfam     | PF00047   | Immunoglobulin domain                                           | 153 | 0.316201 | bottom    | 8.46E-05 |
| Pfam     | PF00520   | Ion transport protein                                           | 49  | 0.565514 | both ends | 0.00013  |
| Pfam     | PF13895   | Immunoglobulin domain                                           | 125 | 0.365916 | bottom    | 0.00048  |
| Pfam     | PF00059   | Lectin C-type domain                                            | 38  | 0.730318 | both ends | 0.0024   |
| Pfam     | PF00271   | Helicase conserved C-terminal domain                            | 83  | 0.268068 | top       | 0.0042   |
| InterPro | IPR017452 | GPCR, rhodopsin-like, 7TM                                       | 111 | 0.480819 | both ends | 2.02E-08 |
| InterPro | IPR000276 | G protein-coupled receptor, rhodopsin-like                      | 110 | 0.484113 | both ends | 2.46E-08 |
| InterPro | IPR003597 | Immunoglobulin C1-set                                           | 26  | 1.37608  | bottom    | 5.14E-06 |
| InterPro | IPR013106 | Immunoglobulin V-set domain                                     | 97  | 0.602733 | bottom    | 1.05E-05 |
| InterPro | IPR005821 | Ion transport domain                                            | 50  | 0.525875 | both ends | 0.000017 |
| InterPro | IPR003006 | Immunoglobulin/major histocompatibility complex, conserved site | 23  | 1.25762  | bottom    | 7.16E-05 |
| InterPro | IPR011989 | Armadillo-like helical                                          | 152 | 0.247023 | top       | 7.16E-05 |
| InterPro | IPR036961 | Kinesin motor domain superfamily                                | 53  | 0.459247 | top       | 0.00031  |
| InterPro | IPR011162 | MHC classes I/II-like antigen recognition protein               | 22  | 1.12071  | bottom    | 0.0017   |
| InterPro | IPR008983 | Tumour necrosis factor-like domain superfamily                  | 29  | 0.792984 | both ends | 0.0038   |
| InterPro | IPR027359 | Voltage-dependent channel domain superfamily                    | 23  | 0.5187   | both ends | 0.0038   |
| InterPro | IPR001304 | C-type lectin-like                                              | 39  | 0.318704 | bottom    | 0.0074   |
| InterPro | IPR014001 | Helicase superfamily 1/2, ATP-binding domain                    | 83  | 0.272641 | top       | 0.0074   |
| InterPro | IPR016186 | C-type lectin-like/link domain superfamily                      | 47  | 0.193553 | bottom    | 0.0074   |
| InterPro | IPR001650 | Helicase, C-terminal                                            | 82  | 0.247572 | top       | 0.0094   |
| SMART    | SM00409   | Immunoglobulin                                                  | 190 | 0.55623  | bottom    | 1.14E-13 |
| SMART    | SM00407   | Immunoglobulin C-Type                                           | 28  | 1.28552  | bottom    | 4.38E-07 |
| SMART    | SM00034   | C-type lectin (CTL) or carbohydrate-recognition domain (CRD)    | 39  | 0.721911 | both ends | 0.00086  |
| SMART    | SM00487   | DEAD-like helicases superfamily                                 | 77  | 0.270194 | top       | 0.0049   |
| SMART    | SM00490   | Helicase superfamily c-terminal domain                          | 77  | 0.269953 | top       | 0.0058   |

**Suppl. Table 5:** Missense variants in RFI QTL genes.

| Uploaded_variation | Location   | SYMBOL         | Amino acids | SIFT | Conserved domain |
|--------------------|------------|----------------|-------------|------|------------------|
| 9_86549936_A/C     | 9:86549936 | <i>AHR</i>     | T/P         | 1    | -                |
| 9_86550830_G/T     | 9:86550830 | <i>AHR</i>     | G/C         | 0,3  | -                |
| 9_86551088_T/C     | 9:86551088 | <i>AHR</i>     | F/L         | 1    | -                |
| 9_86553513_A/C     | 9:86553513 | <i>AHR</i>     | T/P         | 1    | -                |
| 9_88762764_G/T     | 9:88762764 | <i>POLR1F</i>  | T/K         | 1    | -                |
| 9_89160365_C/T     | 9:89160365 | <i>MACC1</i>   | V/I         | 0,28 | -                |
| 9_90767111_G/C     | 9:90767111 | <i>DNAH11</i>  | R/T         | 0    | Dynein_heavy     |
| 9_90767143_G/A     | 9:90767143 | <i>DNAH11</i>  | A/T         | 0    | Dynein_heavy     |
| 9_90774352_C/T     | 9:90774352 | <i>CDCA7L</i>  | R/K         | 0,79 | -                |
| 9_90778151_A/G     | 9:90778151 | <i>CDCA7L</i>  | S/P         | 1    | -                |
| 9_90962105_T/C     | 9:90962105 | <i>RAPGEF5</i> | I/V         | 1    | RasGEF           |
